# Supplementary material for: Influence of Composition, Layer Thickness, and 2D Layer Coupling on Electrochemical Manufacturing
Source: Research Square preprint supplement (doi:10.21203/rs.3.rs-8207533/v1), 2025-12-16
Supplement: Supplementary file 1 [file a0bcae7b0b072d0a1dd58b36.docx]

**Supporting Information**

**Influence of Composition, Layer Thickness, and 2D Layer Coupling on Electrochemical Manufacturing**

Bright Ngozichukwu1, Eugenie Pranada,2, Ray Yoo1, Niels Kubitza3, Christina S. Birkel3,4 , Abdoulaye Djire1,2*

1Artie McFerrin Department of Chemical Engineering, Texas A&M University, College Station, TX 77843, USA

2Department of Materials Science & Engineering, Texas A&M University, College Station, TX 77843, USA

3Department of Chemistry and Biochemistry, Technische Universitat Darmstadt, Darmstadt, 64287, Germany

4School of Molecular Sciences, Arizona State University, Tempe AZ-85282, USA

*Corresponding Author: [adjire@tamu.edu](mailto:adjire@tamu.edu)

**Chemicals**
All reagents were used as received without any additional purification. Potassium bicarbonate (KHCO₃), dimethyl sulfoxide (DMSO), formic acid, and deuterium oxide (D₂O) were obtained from Sigma-Aldrich. The hydrophobic gas diffusion layer (GDL) employed as the electrode substrate was sourced from Fuel Cell Store, and the Nafion 117 proton-exchange membrane was supplied by Ion Power Inc.

**Product Detection Analysis**

A sampling line was connected from the headspace of the catholyte reservoir to a gas chromatograph (GC-QP2020 NX, Shimadzu) to enable continuous monitoring of gaseous products. Gas-phase species were analyzed after 1 hour of electrolysis. The chromatograph was fitted with a MolSieve 5A packed column and operated with the detector and column maintained at 220 °C and 400 °C, respectively. Argon (Airgas, 99.999%) was used as the carrier gas under constant pressure. Carbon monoxide was detected using a flame-ionization detector (FID) equipped with a methanizer. Instrument calibration was performed using certified multicomponent calibration mixtures from Air Liquide (Scott Mini-Mix), covering concentrations between 100 and 16 900 ppm. Faradaic efficiencies for the gaseous products were obtained using the equation:

The transfer electron number is denoted by n, and the Faraday constant by F, which has a value of 96485 C mol-1. The generated mole fraction of each gas is given by x, and the molar flowrate in mol/s is represented by where is the volumetric flowrate P, T and R represent pressure (Pa), temperature (K), and gas constant of 8.314 J/mol K, respectively. The total amount of current is denoted by I (A). These measurements were performed under room temperature and ambient pressure.

Liquid-phase products were analyzed by nuclear magnetic resonance (NMR) spectroscopy using a water-suppression method. For each measurement, 0.5 mL of the post-electrolysis electrolyte was combined with 100 μL of D2O (Sigma-Aldrich, 99.9%) and 0.03 μL of dimethyl sulfoxide (Sigma-Aldrich, 99.9%), which served as the internal standard. The Faradaic efficiency of the detected liquid product was calculated using the equation:

which includes the transfer electron number (n), Faraday efficiency constant (F), concentration of the liquid product determined by 1H NMR (c), electrolyte solution volume (V), and total charge consumed by the reaction (Q), measured by the electrochemical workstation in coulombs.


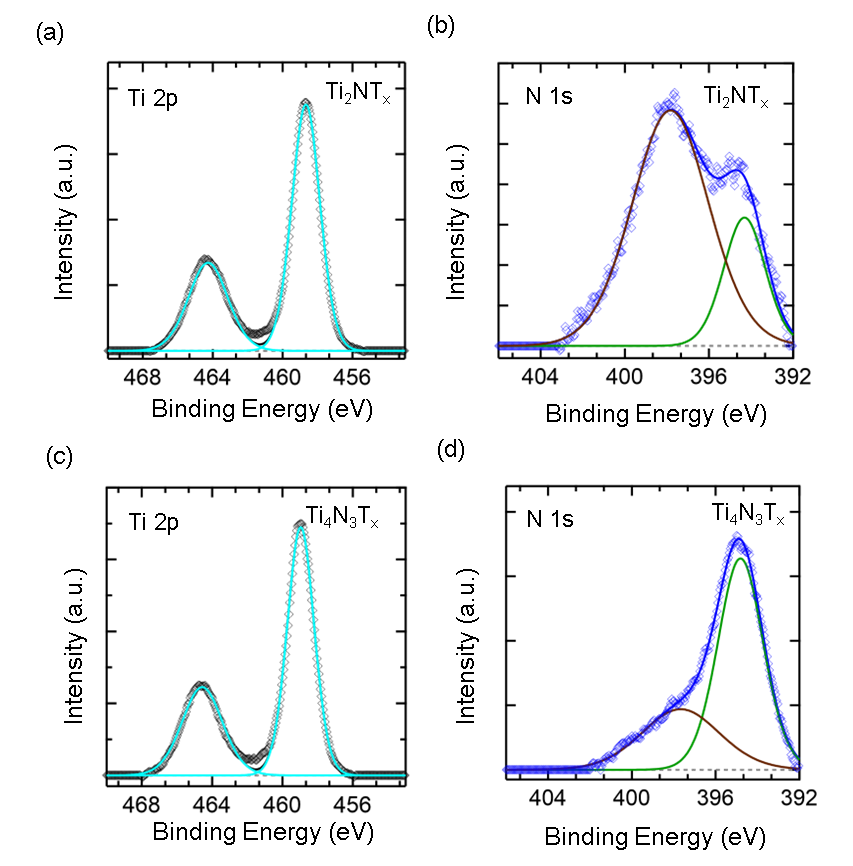


**Figure S1.** High-resolution Ti 2p and N1S XPS spectra of the hybridized (a,b) MoS2/Ti2NTx and (c.d) MoS2/Ti4N3Tx heterostructures.

**
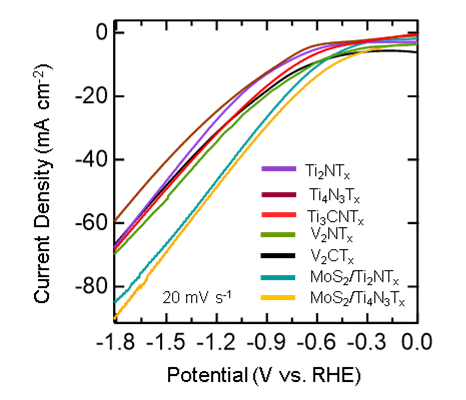
**

**Figure S2.** Linear sweep voltammograms (LSVs) of various electrodes recorded in CO2-purged 1 M KHCO₃ electrolyte at a scan rate of 20 mV s⁻¹.


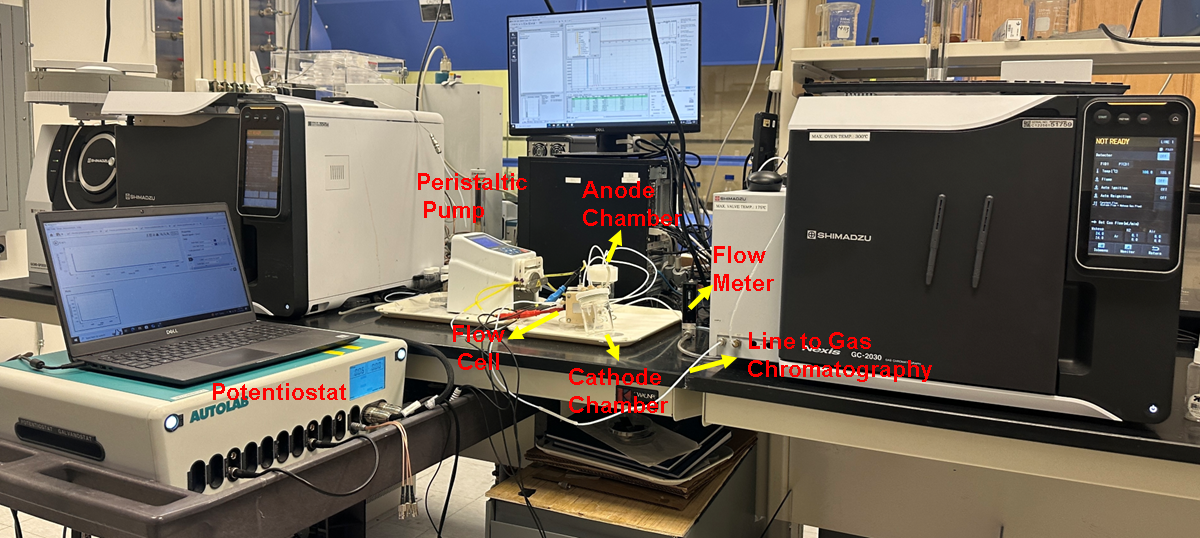


**Figure S3.** Setup for the continuous-flow electrochemical CO2 reduction (CO2RR) experiments and real-time gas product analysis.

**
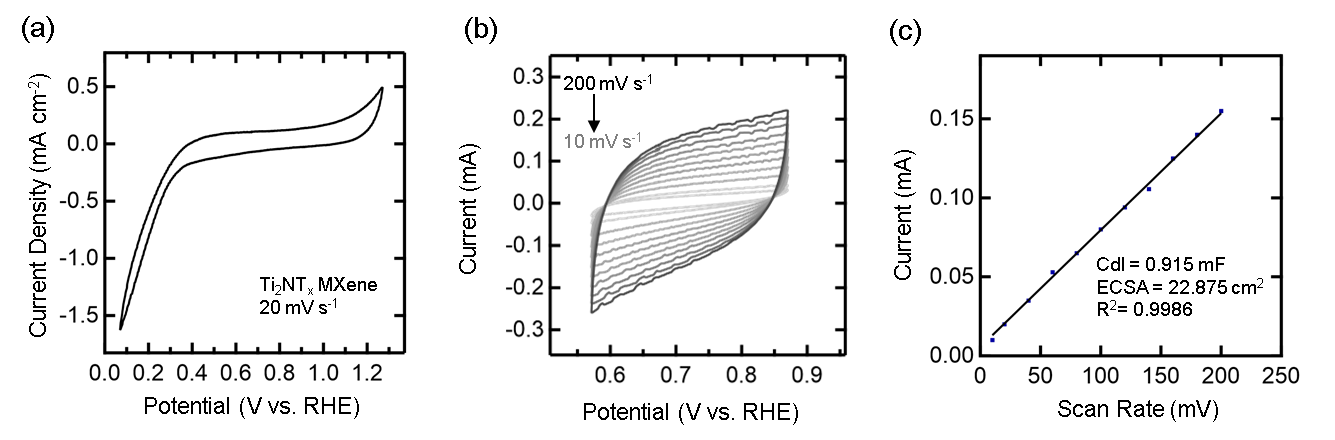
**

**Figure S4.** Electrochemical measurement of hydrothermally synthesized Ti2NTx MXene in 1M KHCO3. (a) Cyclic voltammogram (CV) curve of Ti2NTx MXene (b) CV at non-faradaic region performed at various scan rates used to determine the double layer capacitance of Ti2NTx MXene (c) linear fit curve used for ECSA calculations at different scan rates. Cyclic voltammogram scans were taken in the non-faradaic region.

**
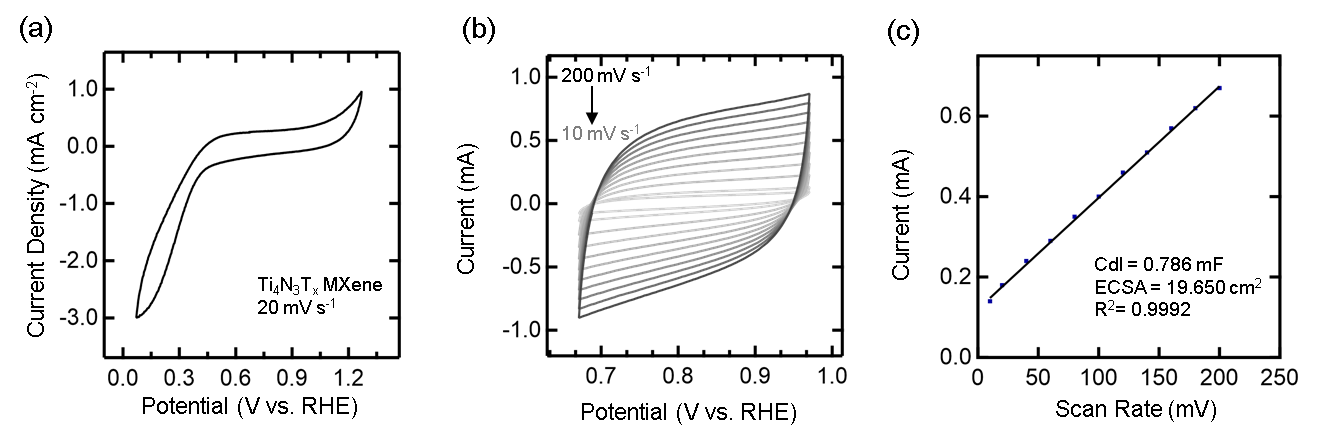
**

**Figure S5.** Electrochemical measurement of hydrothermally synthesized Ti4N3Tx MXene in 1M KHCO3. (a) Cyclic voltammogram (CV) curve of Ti4N3Tx MXene (b) CV at non-faradaic region performed at various scan rates used to determine the double layer capacitance of Ti4N3Tx MXene (c) linear fit curve used for ECSA calculations at different scan rates. Cyclic voltammogram scans were taken in the non-faradaic region.

**
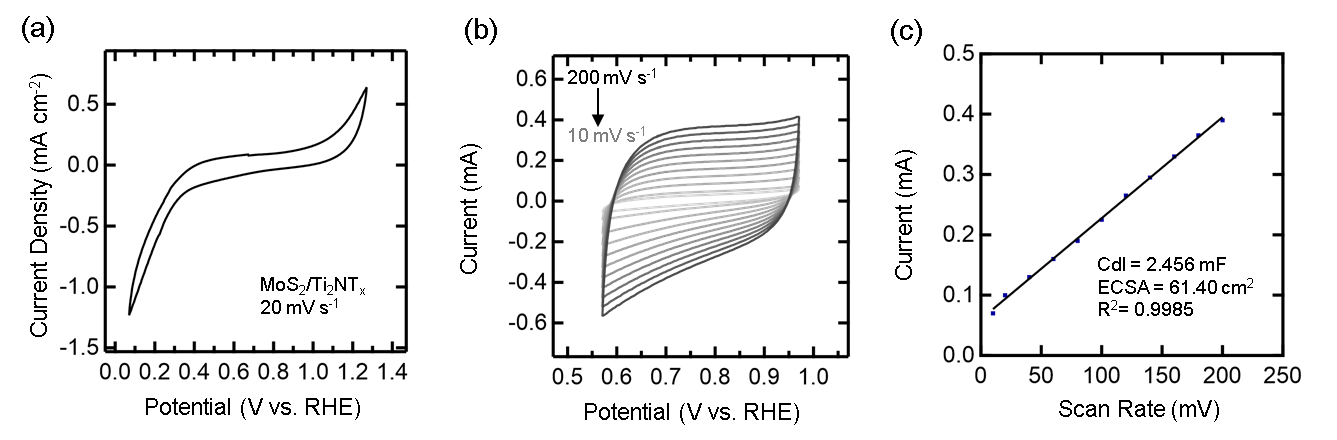
**

**Figure S6.** Electrochemical measurement of hydrothermally synthesized MoS2/Ti2NTx composites in 1M KHCO3. (a) Cyclic voltammogram (CV) curve of MoS2/Ti2NTx composites (b) CV at non-faradaic region performed at various scan rates used to determine the double layer capacitance of MoS2/Ti2NTx composites (c) linear fit curve used for ECSA calculations at different scan rates. Cyclic voltammogram scans were taken in the non-faradaic region.

**
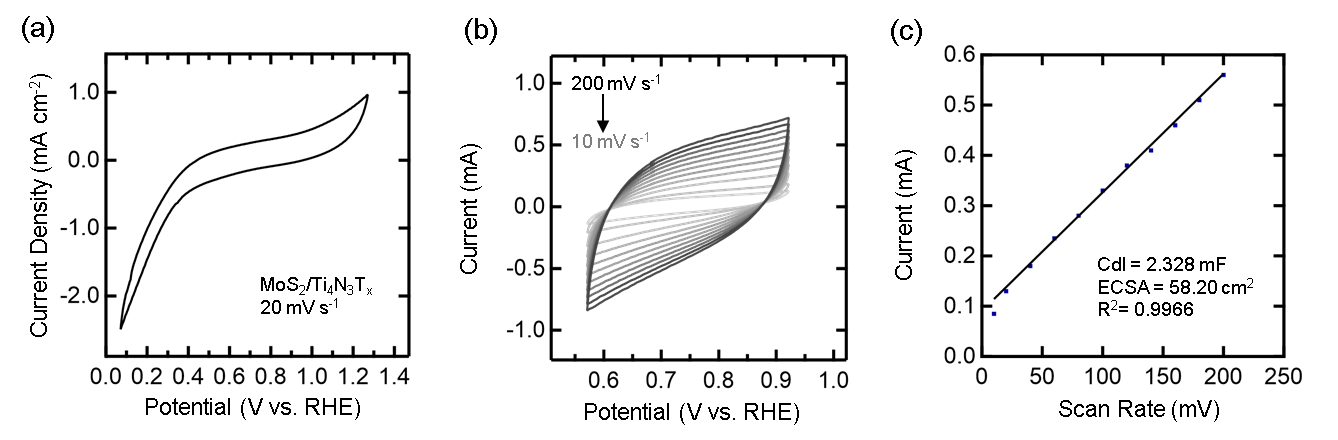
**

**Figure S7.** Electrochemical measurement of hydrothermally synthesized MoS2/Ti4N3Tx composites in 1M KHCO3. (a) Cyclic voltammogram (CV) curve of MoS2/Ti4N3Tx composites (b) CV at non-faradaic region performed at various scan rates used to determine the double layer capacitance of MoS2/Ti4N3Tx composites (c) linear fit curve used for ECSA calculations at different scan rates. Cyclic voltammogram scans were taken in the non-faradaic region.

**
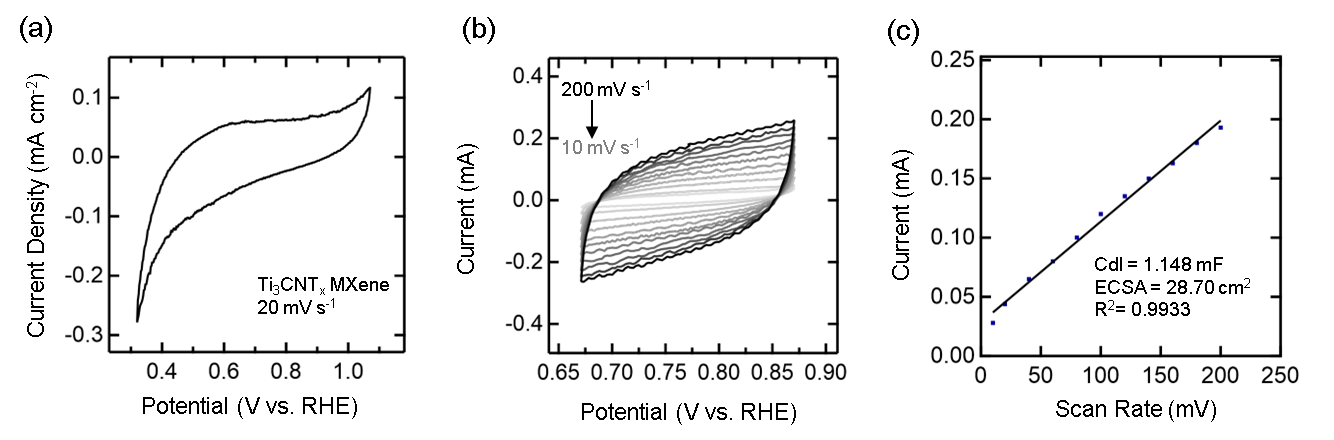
**

**Figure S8.** Electrochemical measurement of hydrothermally synthesized Ti3CNTx MXene in 1M KHCO3. (a) Cyclic voltammogram (CV) curve of Ti3CNTx MXene (b) CV at non-faradaic region performed at various scan rates used to determine the double layer capacitance of Ti3CNTx MXene (c) linear fit curve used for ECSA calculations at different scan rates. Cyclic voltammogram scans were taken in the non-faradaic region.

**
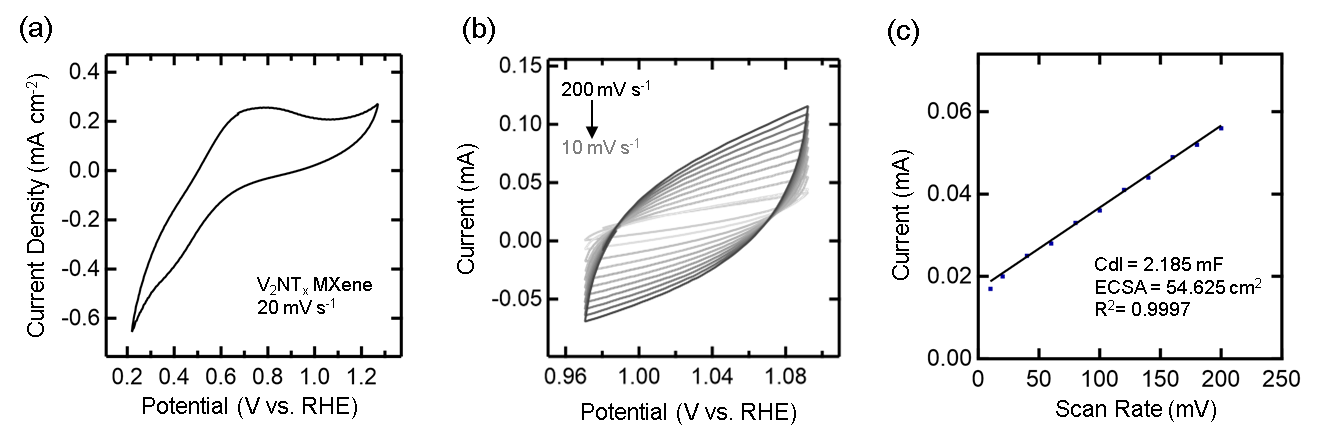
**

**Figure S9.** Electrochemical measurement of hydrothermally synthesized V2NTx MXene in 1M KHCO3. (a) Cyclic voltammogram (CV) curve of V2NTx MXene (b) CV at non-faradaic region performed at various scan rates used to determine the double layer capacitance of V2NTx MXene (c) linear fit curve used for ECSA calculations at different scan rates. Cyclic voltammogram scans were taken in the non-faradaic region.

**
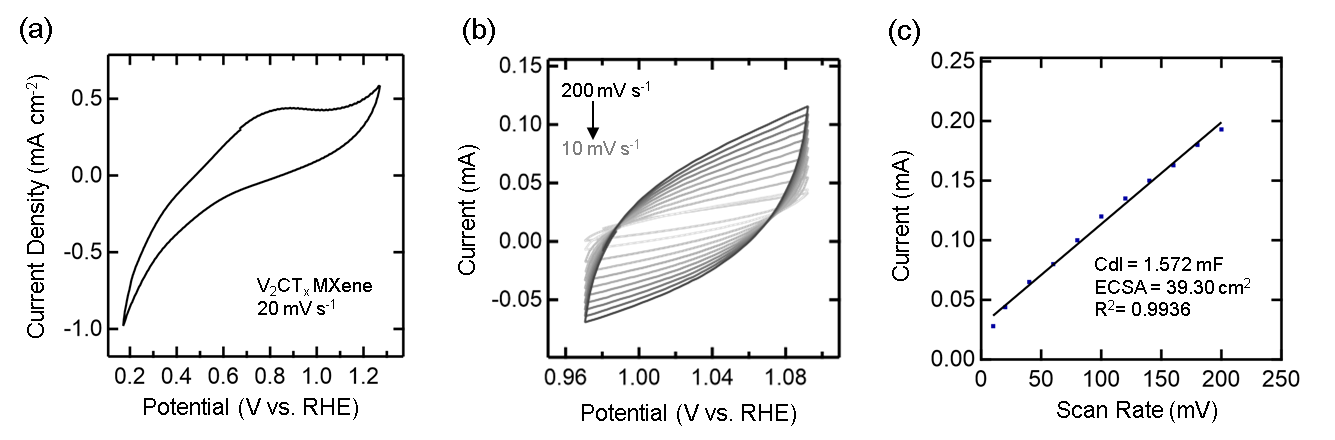
**

**Figure S10.** Electrochemical measurement of hydrothermally synthesized V2CTx MXene in 1M KHCO3. (a) Cyclic voltammogram (CV) curve of V2CTx MXene (b) CV at non-faradaic region performed at various scan rates used to determine the double layer capacitance of V2CTx MXene (c) linear fit curve used for ECSA calculations at different scan rates. Cyclic voltammogram scans were taken in the non-faradaic region.

**
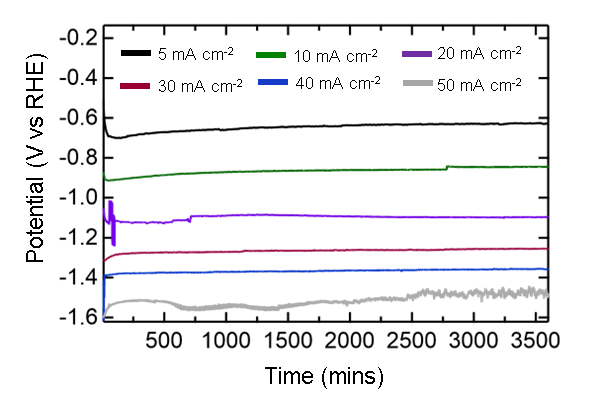
**

**Figure S11.** Chronopotentiometry test curve for Ti2NTx MXene at various current densities in 1M KHCO3

**
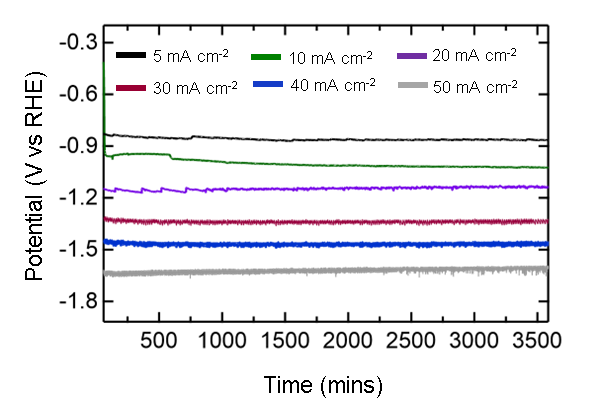
**

**Figure S12.** Chronopotentiometry test curve for Ti4N3Tx MXene at various current densities in 1M KHCO3

**
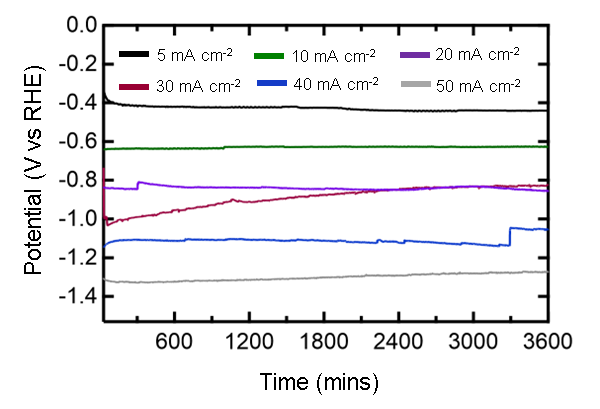
**

**Figure S13.** Chronopotentiometry test curve for MoS2/Ti2NTx at various current densities in 1M KHCO3

**
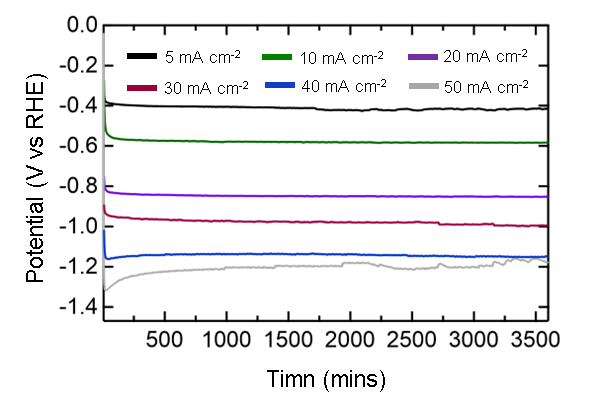
**

**Figure S14.** Chronopotentiometry test curve for MoS2/Ti4N3Tx at various current densities in 1M KHCO3


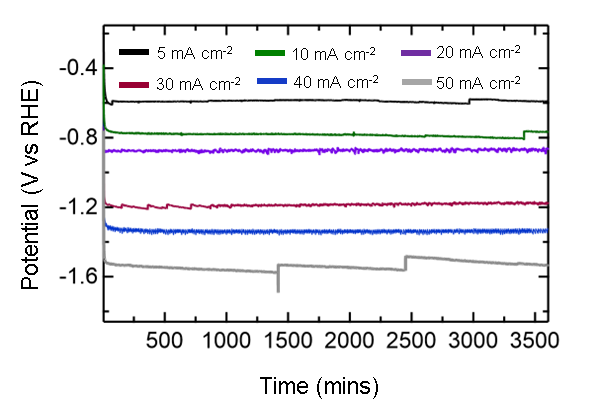


**Figure S15.** Chronopotentiometry test curve for Ti3CNTx at various current densities in 1M KHCO3

**
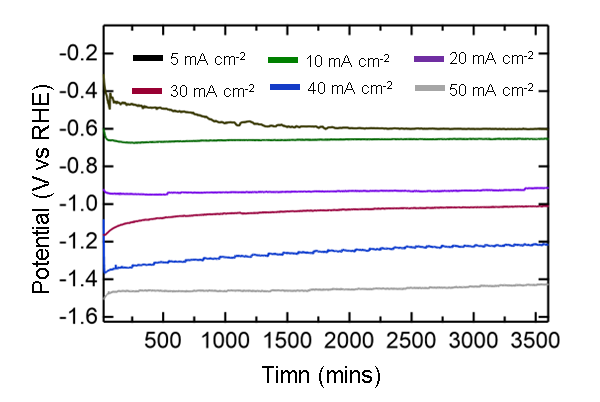
**

**Figure S16.** Chronopotentiometry test curve for V2NTx MXene at various current densities in 1M KHCO3


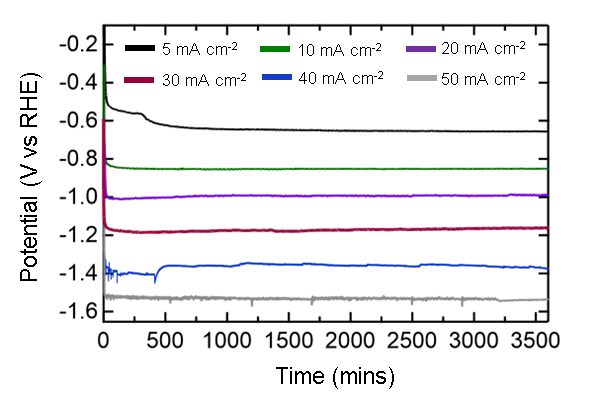


**Figure S17.** Chronopotentiometry test curve for V2CTx MXene at various current densities in 1M KHCO3


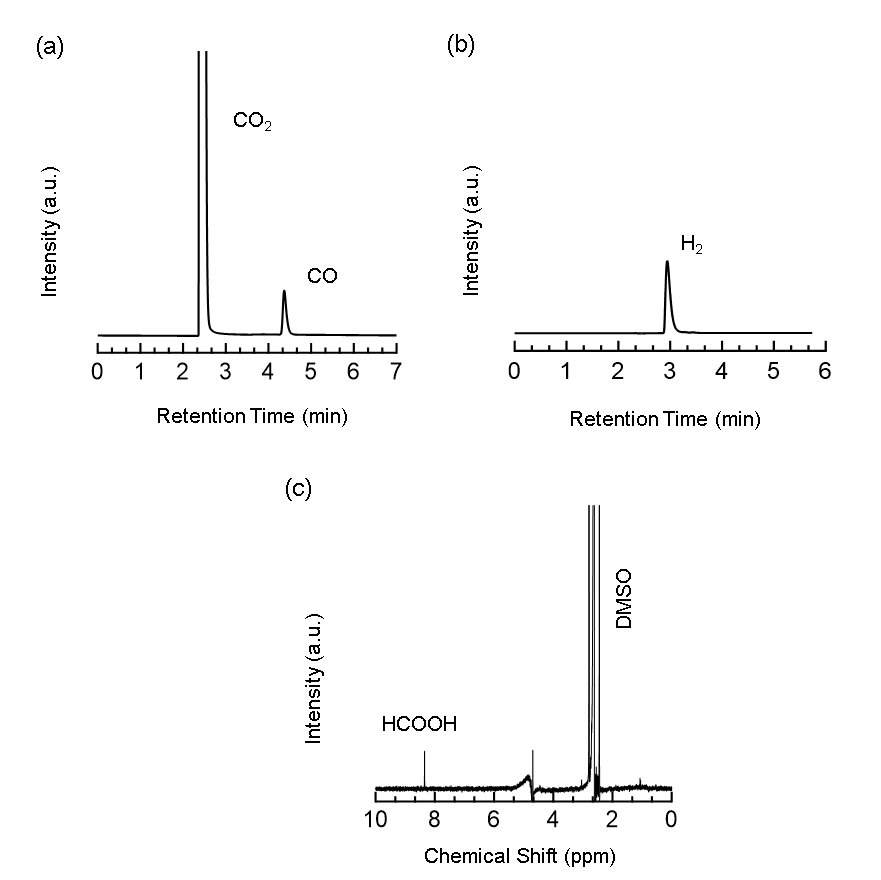


**Figure S18.** Typical CO2RR product analysis over V-based catalyst after 1 h of electrolysis at 30 mA cm-2. GC chromatogram showing (a) CO and (b) H2 as the only gaseous products.
(c) 1H NMR spectrum of the electrolyte after electrolysis, showing formate as the liquid product.
